# Supplementary material
Source: PubMed Central journal article supplement (PMC6437023)
Supplement: NIHMS1508243-supplement-12035_2018_1357_MOESM1_ESM.pdf [file NIHMS1508243-supplement-12035_2018_1357_MOESM1_ESM.pdf]

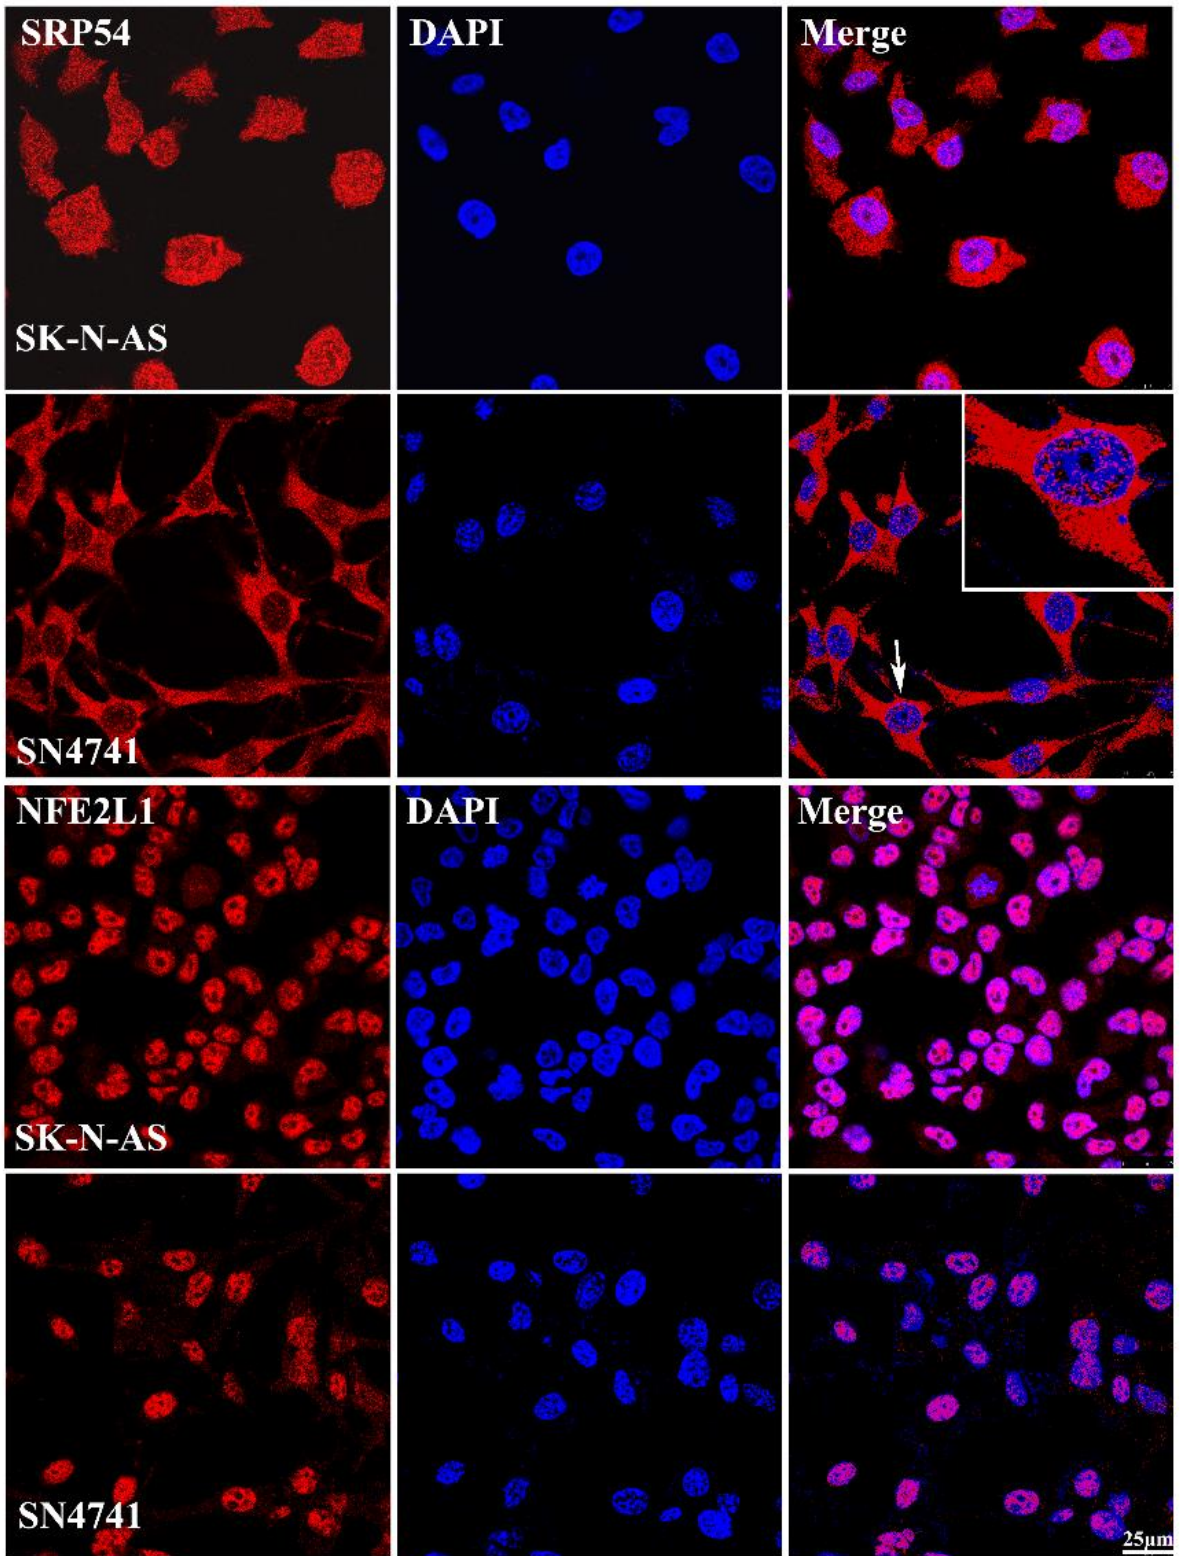

Figure S1. Confocal images of immunofluorescent staining of SRP54 (upper two rows) and Nfe211 (bottom two rows) expressed in nuclei (violet) of SK-N-AS or SN4741 cells, as indicated.
