# Supplementary material
Source: PubMed Central journal article supplement (PMC6437023)
Supplement: NIHMS1508243-supplement-12035_2018_1357_MOESM2_ESM.pdf [file NIHMS1508243-supplement-12035_2018_1357_MOESM2_ESM.pdf]

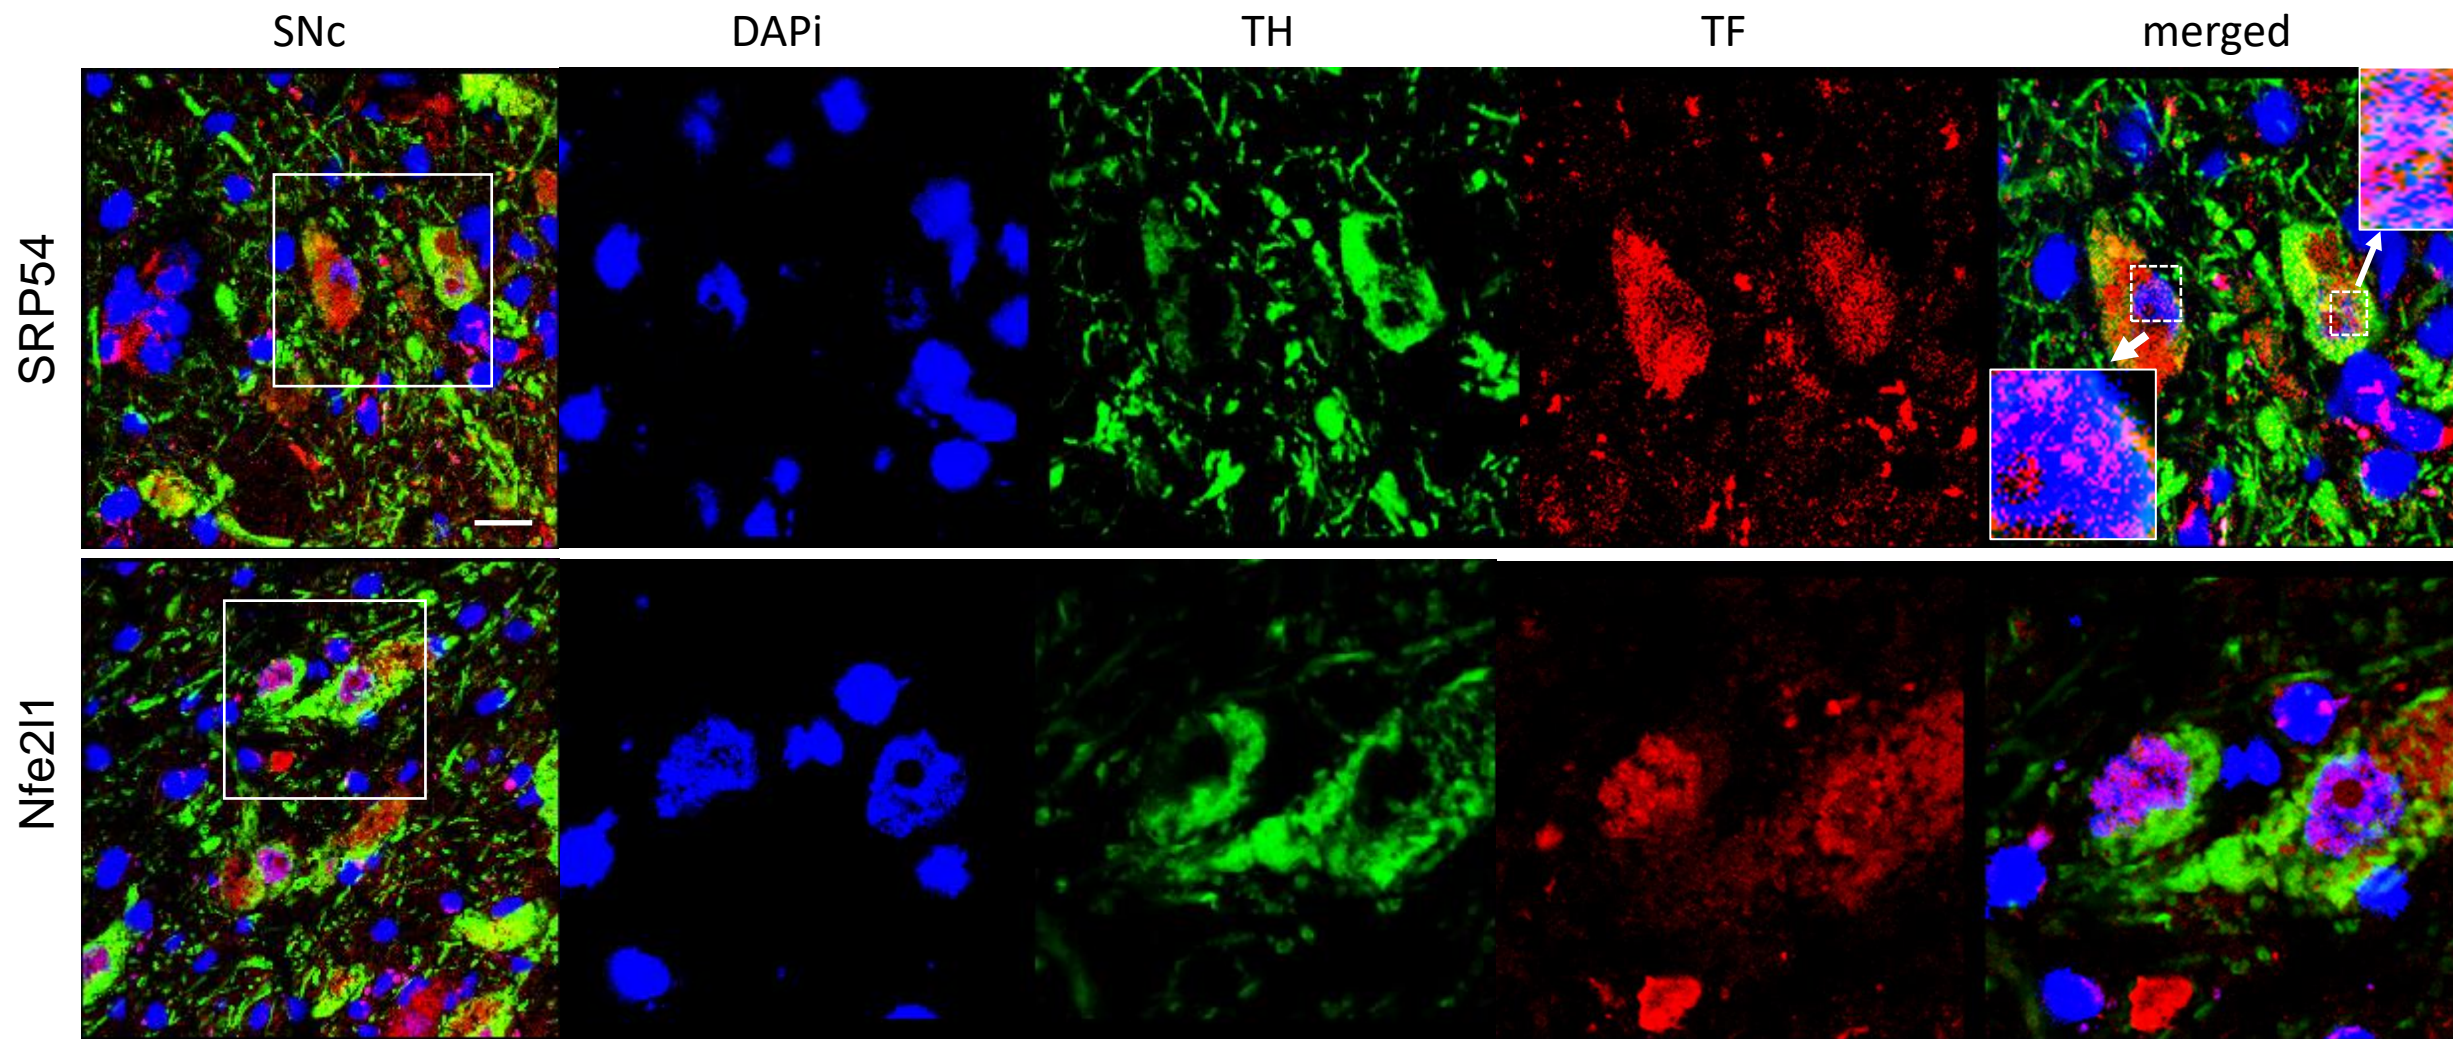

Figure S2. Confocal images of immunofluorescent staining of SRP54 (upper) and Nfe211 (lower) in human postmortem substantia nigra from a healthy subject. TH, labeling of dopamine neurons; violet, nuclear expression of SRP54 or Nfe211. Scale bar: 10 $\mu$ m.
